# Supplementary material
Source: PubMed Central journal article supplement (PMC6116088)

## Supplementary Material

**Supplementary Figure 1. Validation of immunohistochemical staining.** **A.** A negative control staining, omitting the primary TSP-1 antibody, demonstrated no unspecific binding of the secondary antibody. **B.** To determine the specificity for TSP-1 binding, a red fluorescent (AF594) pre-conjugated mouse TSP-1 antibody (clone A6.1) was used to stain wild-type (WT) and TSP-1 knock-out liver tissue. Only in the WT tissue was staining evident. The staining was pervasive through the tissue, but no fluorescence was observed in the nuclei. In contrast, knock-out tissue did not show a binding of the pre-conjugated antibody.

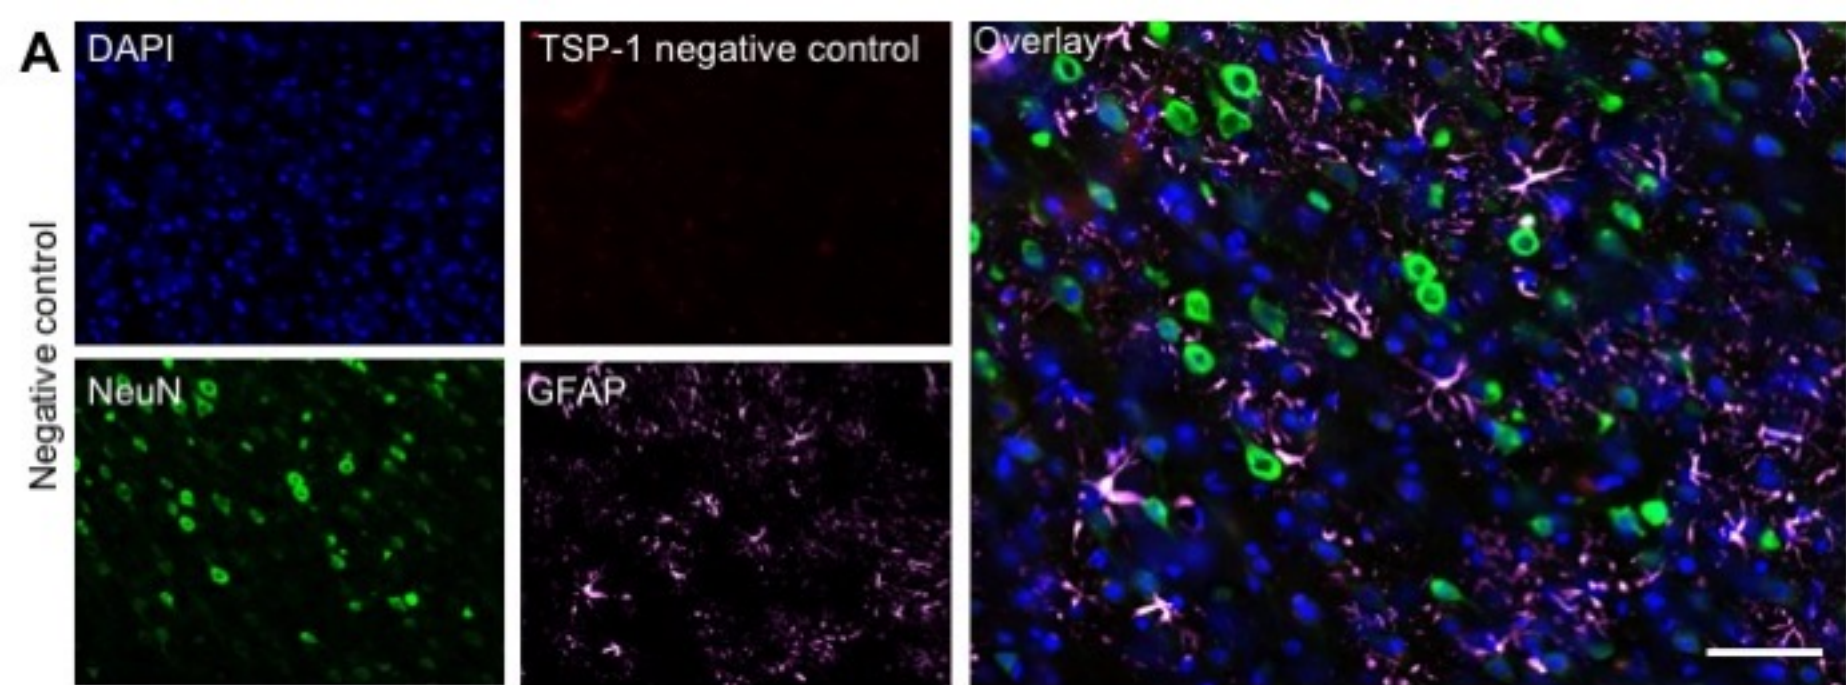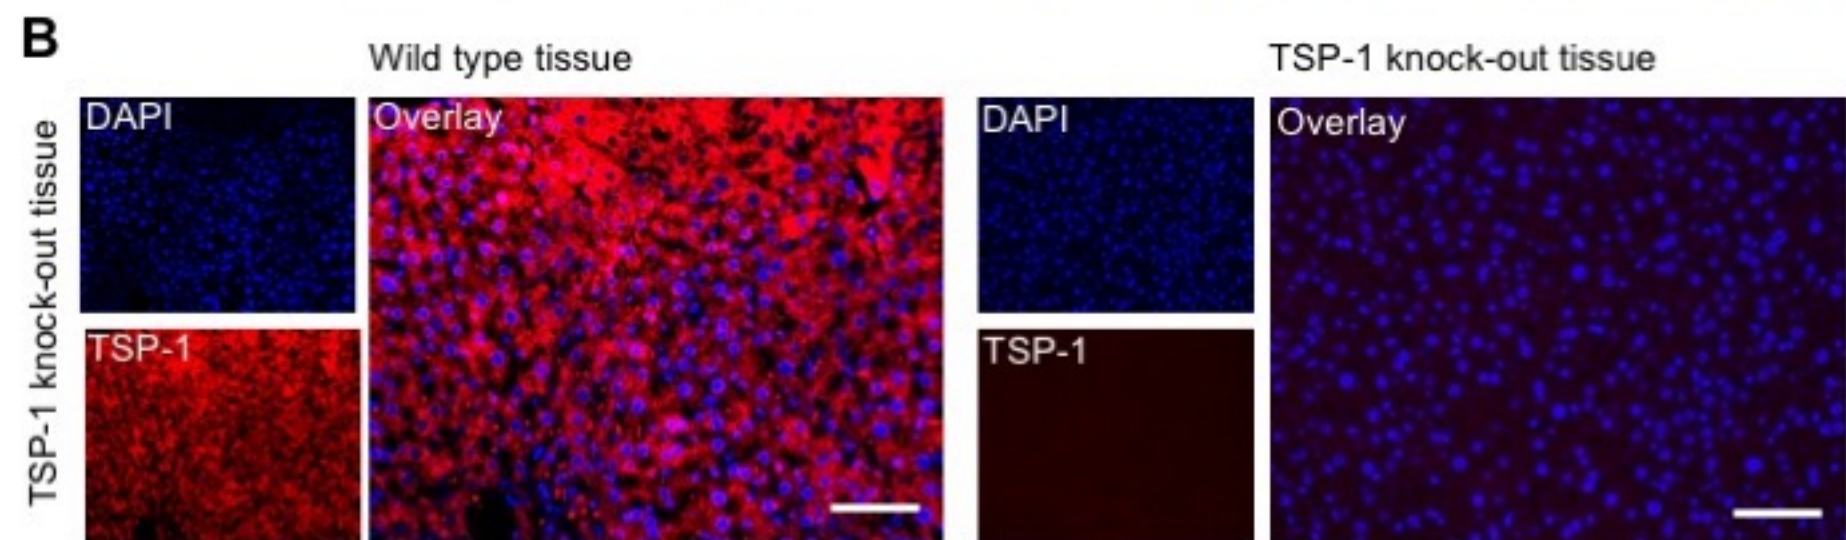

Supplement: JHC771677_Supplemental_Material.pdf [file JHC771677_Supplemental_Material.pdf]
